# Supplementary material for: Evidence for the Association between the Intronic Haplotypes of Ionotropic Glutamate Receptors and First-Episode Schizophrenia
Source: J Pers Med. 2021 Nov 25;11(12):1250. doi: 10.3390/jpm11121250 (PMC8708351; doi:10.3390/jpm11121250)

## **Supplementary Materials**

### **Supplementary Figure S1. The position of the detected variants in the iGluR genes.**

Manhattan plots show the position of each variant in each iGluR gene. Black dots represent variants located in introns and 3'UTRs of genes, while the gray dots indicate variants found in 5'UTRs and exons. Variants above the black horizontal dashed line are potentially associated with SCH based on the significant difference in minor allele frequency between SCH cases and controls (p-value < 0.01).

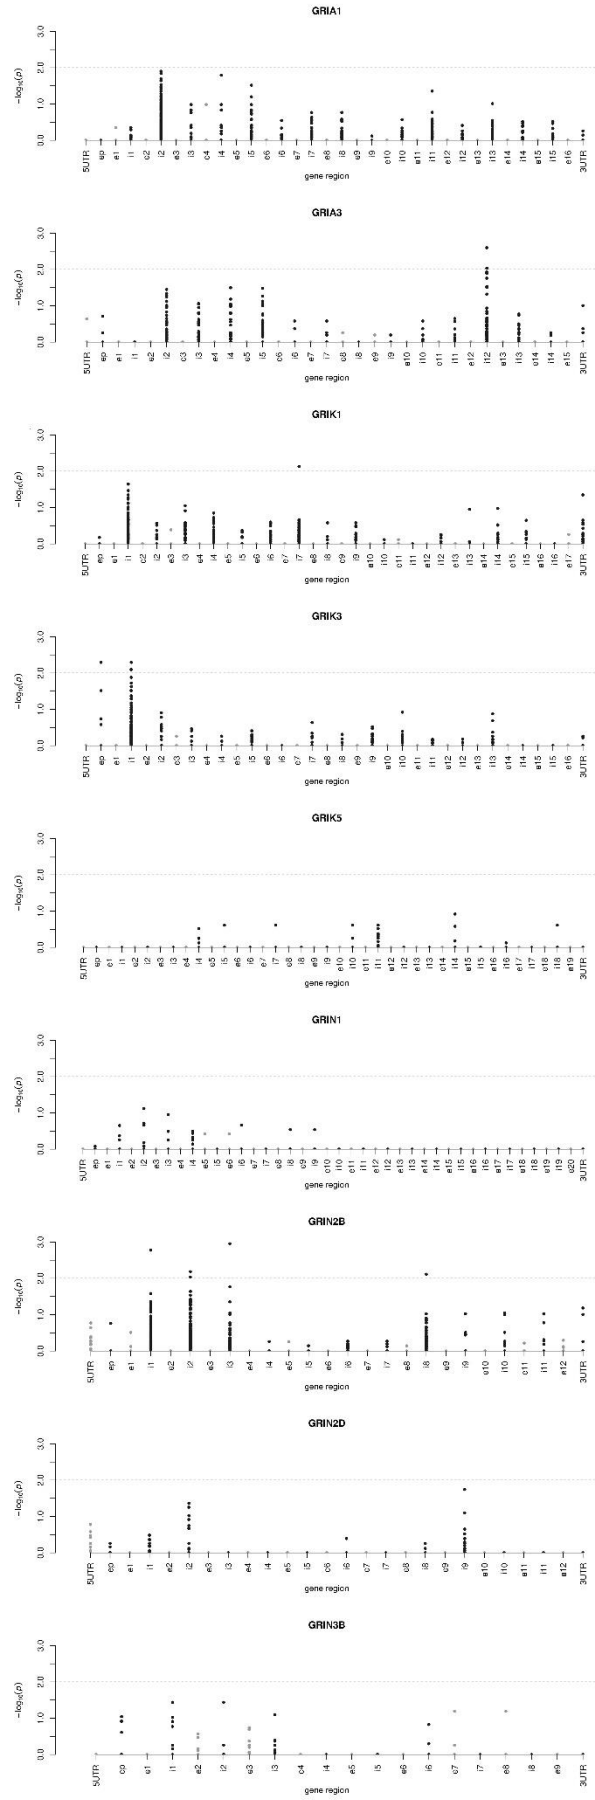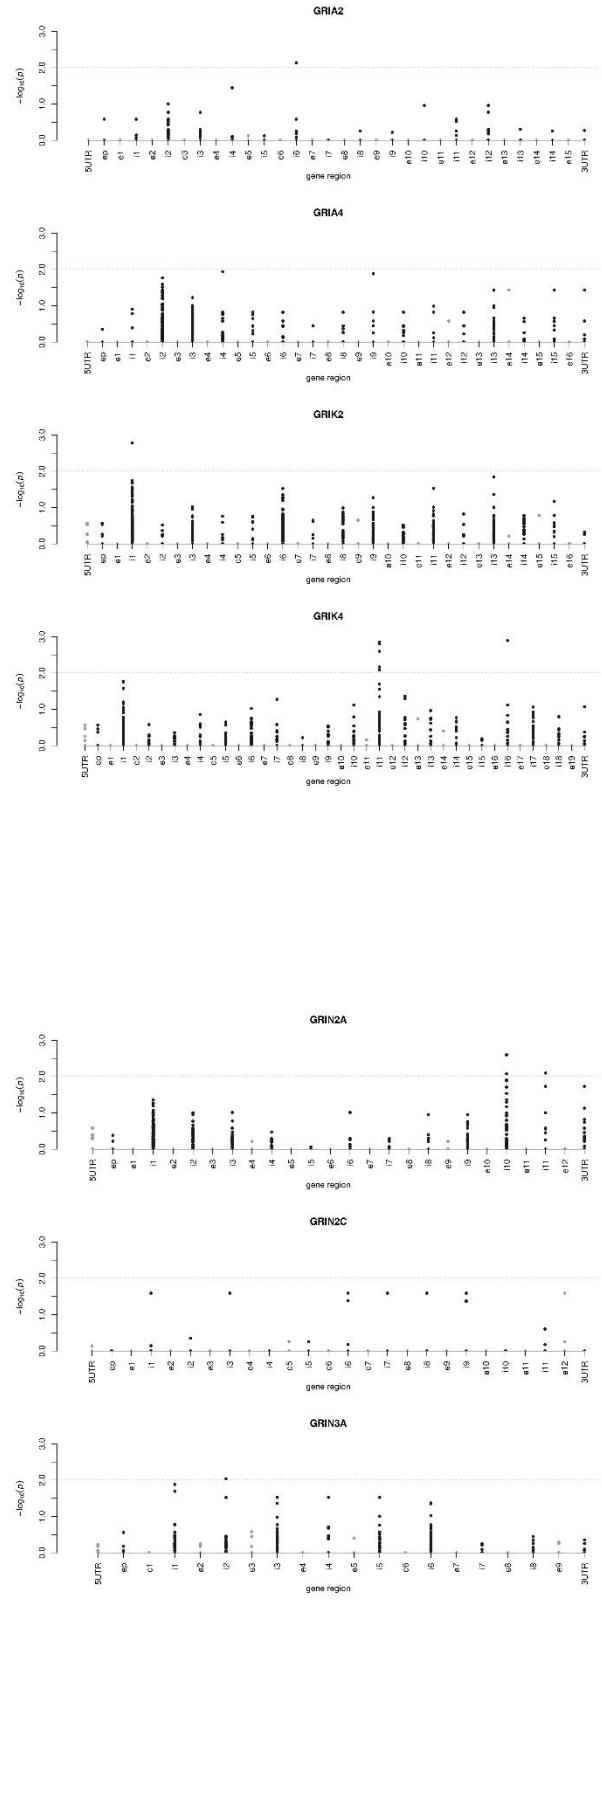

Supplement: Supplementary file 1 [file jpm-11-01250-s001.zip › jpm-1384057-supplementary.pdf]
